# Supplementary material for: Altered Cholesterol Biosynthesis Affects Drug Metabolism
Source: PubMed Central journal article supplement — ACS Omega. 2021 Feb 17;6(8):5490–8. doi: 10.1021/acsomega.0c05817 (PMC7931400; doi:10.1021/acsomega.0c05817), 2021-02-17
Supplement: ao0c05817_si_001.pdf [file ao0c05817_si_001.pdf]

## Supporting Information

# Altered Cholesterol Biosynthesis Affects Drug Metabolism

*Thiago C. Genaro-Mattos*<sup>1</sup>, *Allison Anderson*<sup>1</sup>, *Luke B. Allen*<sup>1,2</sup>, *Zeljka Korade*<sup>2,3\*</sup>  
*and Károly Mirnics*<sup>1,2,4\*</sup>

<sup>1</sup>Munroe-Meyer Institute for Genetics and Rehabilitation, University of Nebraska Medical Center, Omaha, NE, USA, 68105.

<sup>2</sup>Department of Biochemistry and Molecular Biology, College of Medicine, University of Nebraska Medical Center, Omaha, NE, USA, 68198.

<sup>3</sup>Department of Pediatrics, College of Medicine, University of Nebraska Medical Center, Omaha, NE, USA, 68198.

<sup>4</sup>Department of Pharmacology and Experimental Neuroscience, College of Medicine, University of Nebraska Medical Center, Omaha, NE, USA, 68198.

|                        |         |
|------------------------|---------|
| <i>Figure S1</i> ..... | Page S2 |
| <i>Figure S2</i> ..... | Page S3 |
| <i>Figure S3</i> ..... | Page S4 |
| <i>Figure S4</i> ..... | Page S5 |
| <i>Table S1</i> .....  | Page S6 |
| <i>Table S2</i> .....  | Page S6 |

Figure S1

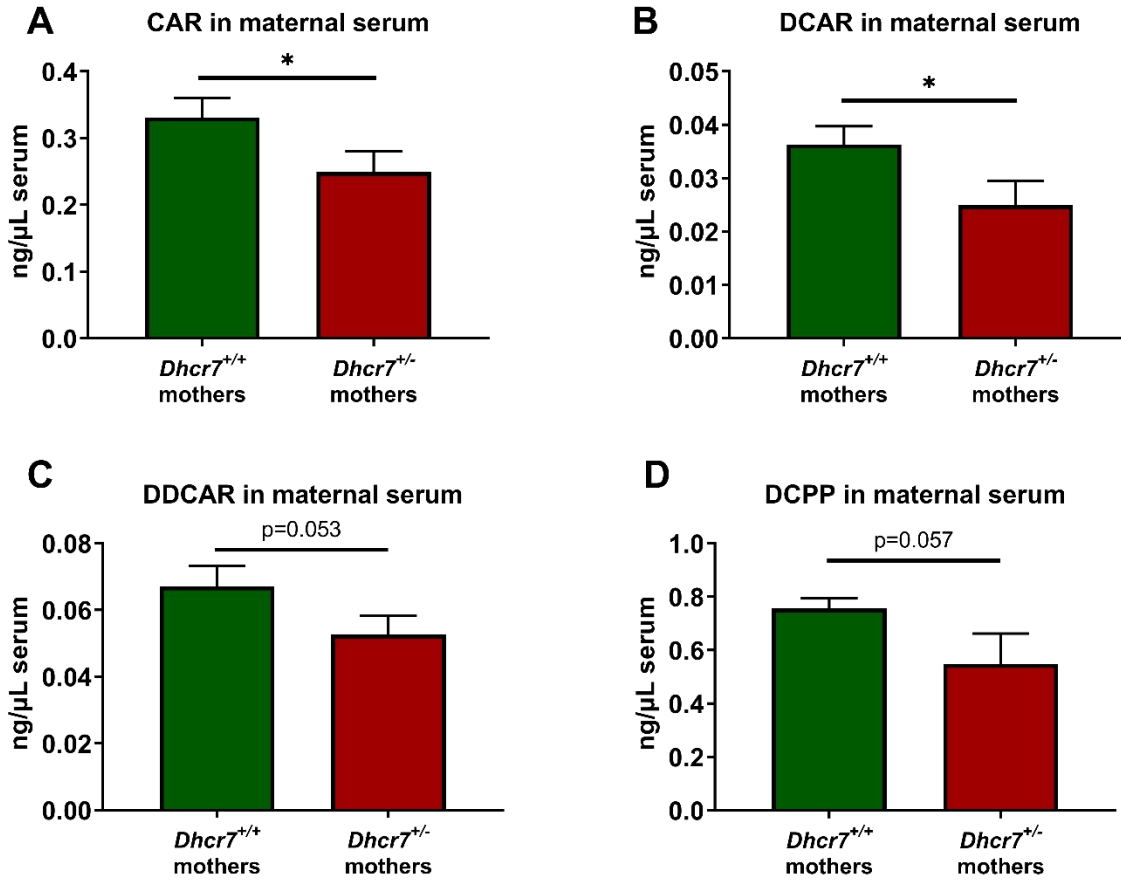

**Figure S1. Levels of CAR and its metabolites depend on maternal genotype.** The levels of CAR and metabolites were determined in the sera of mothers after delivery of pups. Each column corresponds to the mean ± SEM of three animals analyzed in technical triplicate. Statistical significance (unpaired one-tail *t*-test): \**p*<0.05.

Figure S2

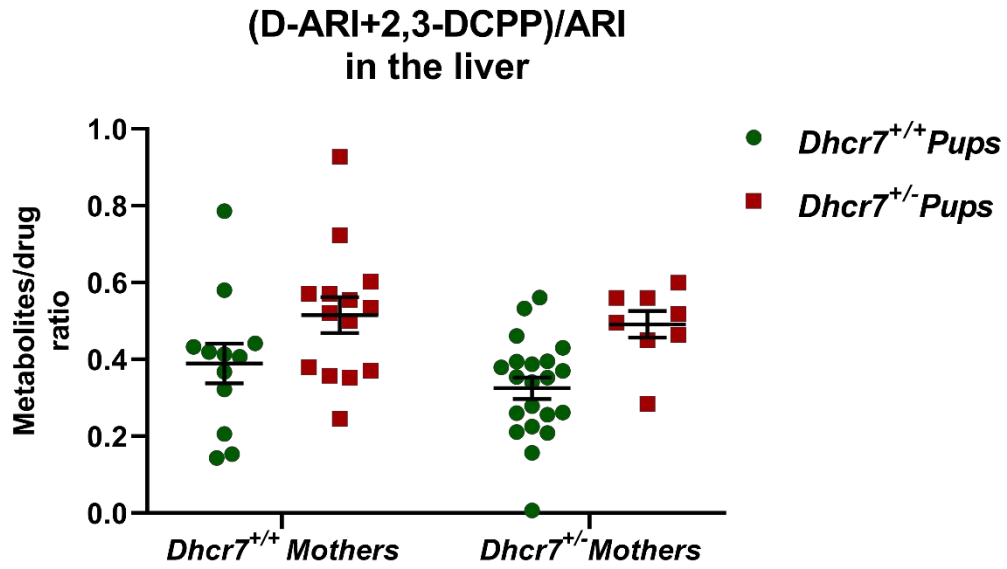

**Figure S2. *Dhcr7<sup>+/-</sup>* mice metabolize ARI faster than WT mice.** Aripiprazole turnover was calculated by determining the ratio of drug metabolites over the parent drug. WT and *Dhcr7<sup>+/-</sup>* pups are depicted in green and red, respectively. Samples were grouped according to both maternal and embryonic genotypes. Bars correspond to the mean  $\pm$  SEM.

Figure S3

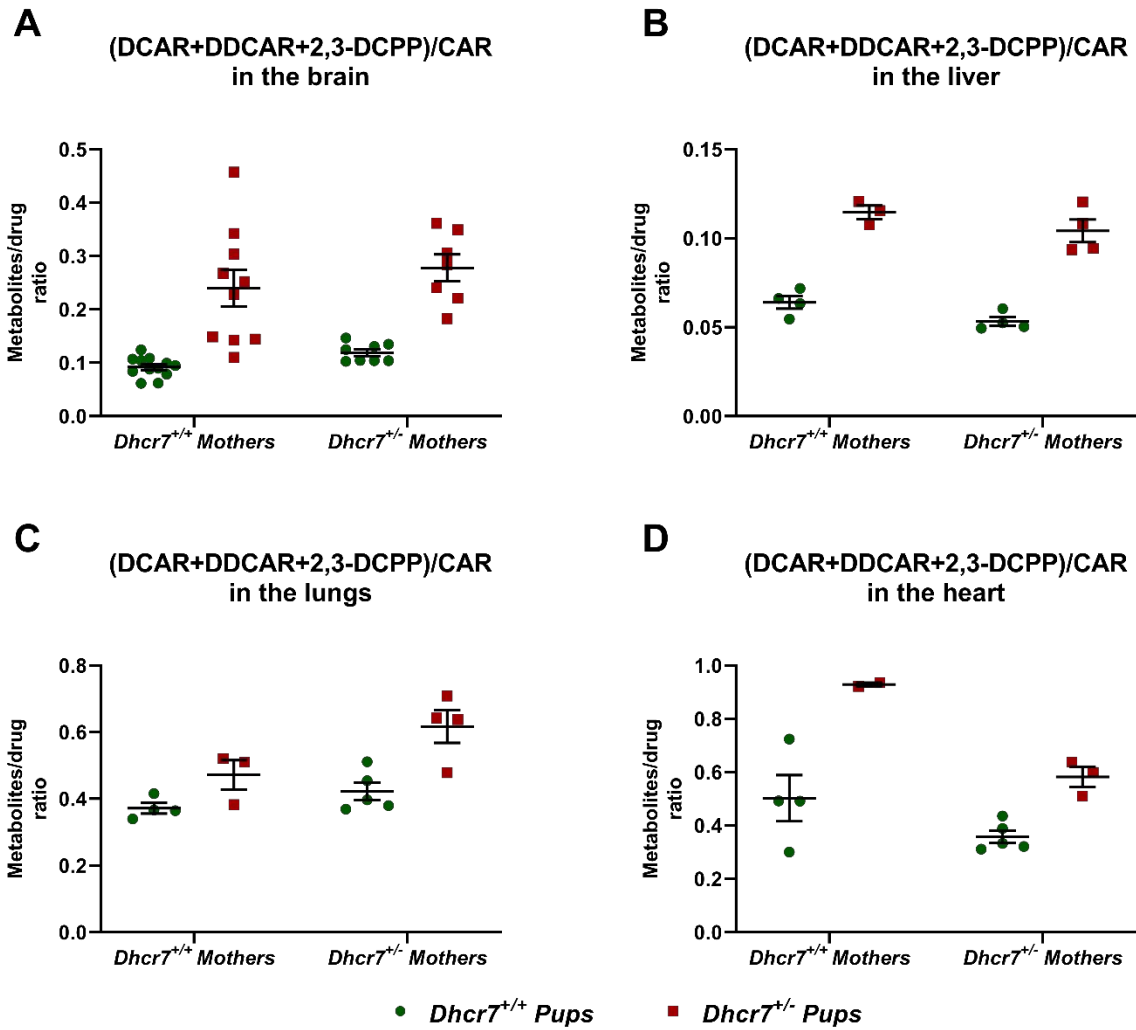

Figure S3. *Dhcr7*<sup>+/-</sup> mice metabolize CAR faster than WT mice. Cariprazine turnover was calculated by determining the ratio of drug metabolites over the parent drug. WT and *Dhcr7*<sup>+/-</sup> pups are depicted in green and red, respectively. Samples were grouped according to both maternal and embryonic genotypes. Bars correspond to the mean ± SEM.

Figure S4

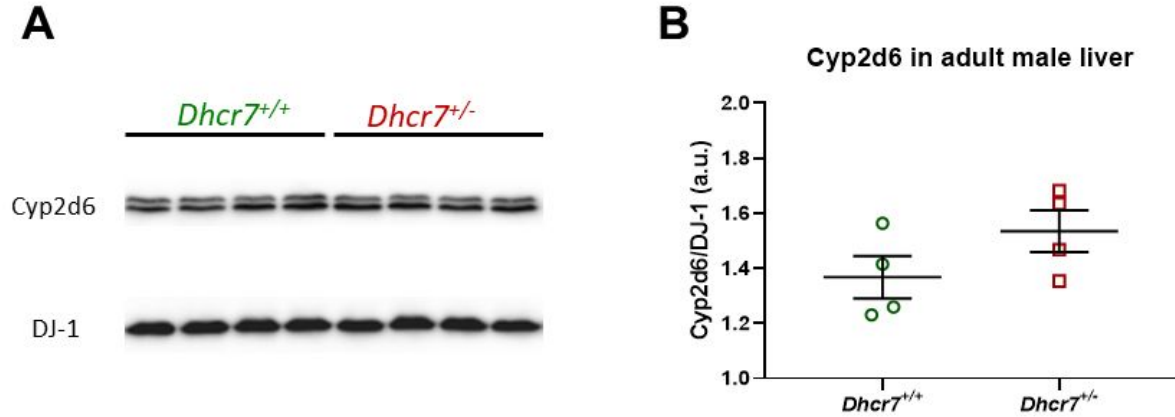

**Figure S4. Cyp2d6 protein expression is increased in the liver of adult male *Dhcr7*<sup>+/-</sup> mice.** **A)** Western blot for Cyp2d6. Expression of housekeeping protein DJ-1 was used as a loading control. Each lane corresponds to liver samples from different animals. **B)** Optical density quantification of bands, with Cyp2d6 normalized to DJ-1. The values on **panel B** are shown as averages  $\pm$  SEM of four biological replicates.

**Table S1.** ANOVA analysis of ARI turnover in P0 livers.

| #        | Comparison                                                                     | ARI           |
|----------|--------------------------------------------------------------------------------|---------------|
| <b>1</b> | Embryonic genotype: <i>Dhcr7</i> <sup>+/+</sup> vs <i>Dhcr7</i> <sup>+/-</sup> | <b>0.0013</b> |
| <b>2</b> | Maternal genotype: <i>Dhcr7</i> <sup>+/+</sup> vs <i>Dhcr7</i> <sup>+/-</sup>  | 0.3086        |
| <b>3</b> | Two-way interaction: maternal <i>Dhcr7</i> vs embryonic <i>Dhcr7</i> genotypes | 0.6365        |

**Table S2.** ANOVA analysis of CAR turnover in different tissues of P0 mice.

| #        | Comparison                                                                     | Brain             | Liver             | Lungs         | Heart         |
|----------|--------------------------------------------------------------------------------|-------------------|-------------------|---------------|---------------|
| <b>1</b> | Embryonic genotype: <i>Dhcr7</i> <sup>+/+</sup> vs <i>Dhcr7</i> <sup>+/-</sup> | <b>&lt;0.0001</b> | <b>&lt;0.0001</b> | <b>0.0013</b> | <b>0.0003</b> |
| <b>2</b> | Maternal genotype: <i>Dhcr7</i> <sup>+/+</sup> vs <i>Dhcr7</i> <sup>+/-</sup>  | 0.1450            | <b>0.0361</b>     | <b>0.0166</b> | <b>0.0021</b> |
| <b>3</b> | Two-way interaction: maternal <i>Dhcr7</i> vs embryonic <i>Dhcr7</i> genotypes | 0.8042            | 0.9716            | 0.2039        | 0.1196        |

Rows #1-2 denote statistical significance for single variables; #3 reports probability for the two interacting factors; values highlighted in bold denote p<0.05. No statistical difference was observed between male and female animals.
